# Supplementary material for: Switching the thermodynamics of MgH2nanoparticles through polystyrene stabilisation and oxidation
Source: Royal Society of Chemistry journal article supplement (doi:10.1039/c4ra08404g), 2014-08-19
Supplement: c4ra08404g1.pdf [file c4ra08404g1.pdf]

## **ELECTRONIC SUPPLEMENTARY INFORMATION**

### **Switching the thermodynamics of MgH<sub>2</sub> nanoparticles through polystyrene stabilisation and oxidation**

Eki J.Setijadi,<sup>1,2</sup> Cyrille Boyer,<sup>2</sup> and Kondo-Francois Aguey-Zinsou<sup>1,\*</sup>

<sup>1</sup> MERLin group, School of Chemical Engineering, The University of New South Wales, Sydney  
NSW 2052, Australia.

<sup>2</sup> Centre for Advanced Macromolecular Design, School of Chemical Engineering, The University  
of New South Wales, Sydney NSW 2052, Australia

E-mail: f.aguey@unsw.edu.au, Tel: +61 (0)2 938 57970, Fax: +61 (0)2 938 55966

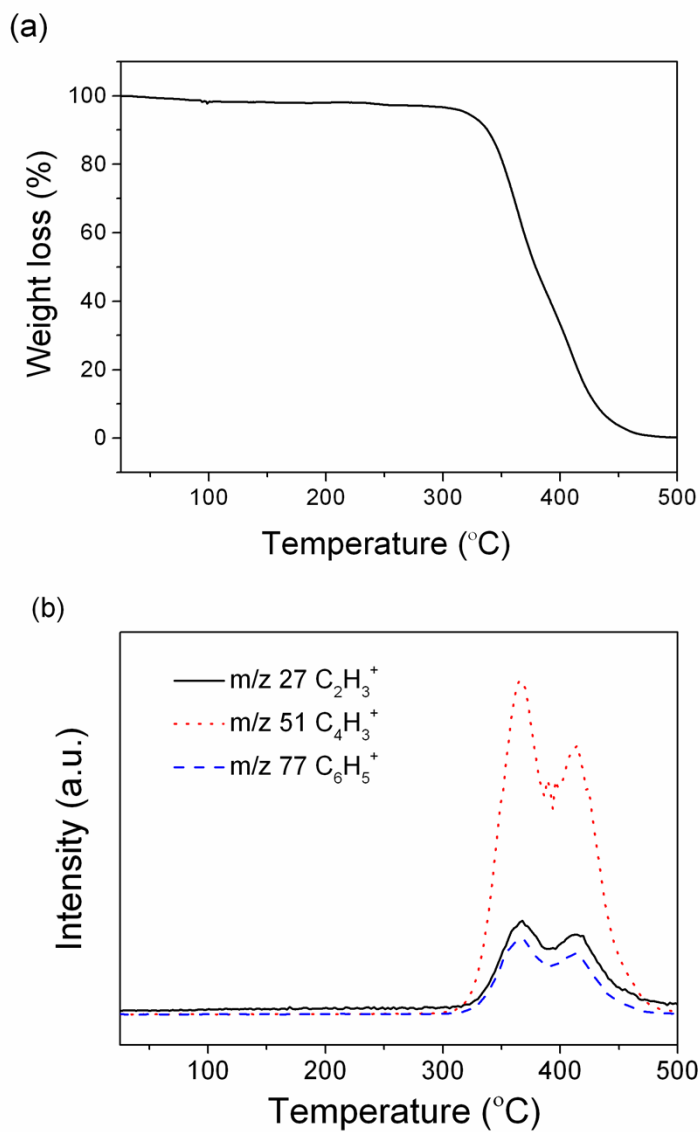

**Fig. S1** – (a) TGA profile of PSTN and (b) associated gas evolution as followed by MS for selected m/z. Heating rate  $10\text{C}\cdot\text{min}^{-1}$  under an Ar flow of  $20\text{ mL}\cdot\text{min}^{-1}$ .

Complete decomposition of the polymer occurred between 330 and 450 °C.

(a) MgH<sub>2</sub>/C

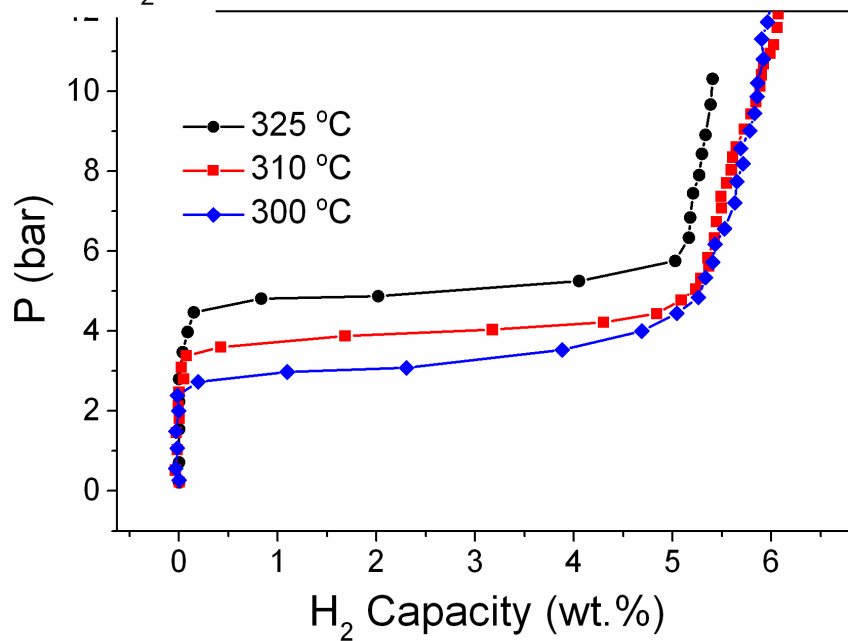

(b) MgH<sub>2</sub>/C oxidised

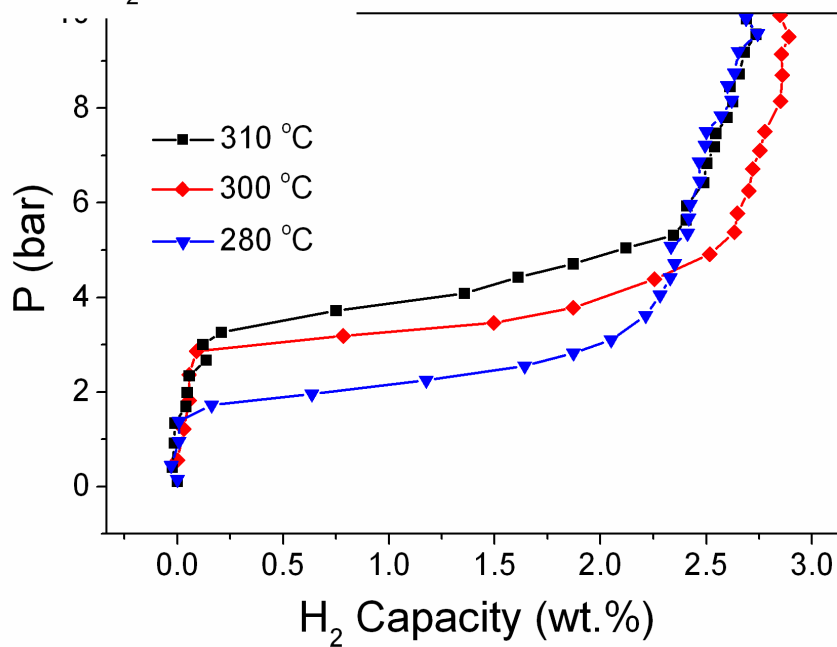

**Fig. S2.** PCI corresponding to the absorption of hydrogen in MgH<sub>2</sub>/C before and after oxidation.

(a) MgH<sub>2</sub>/PSTN

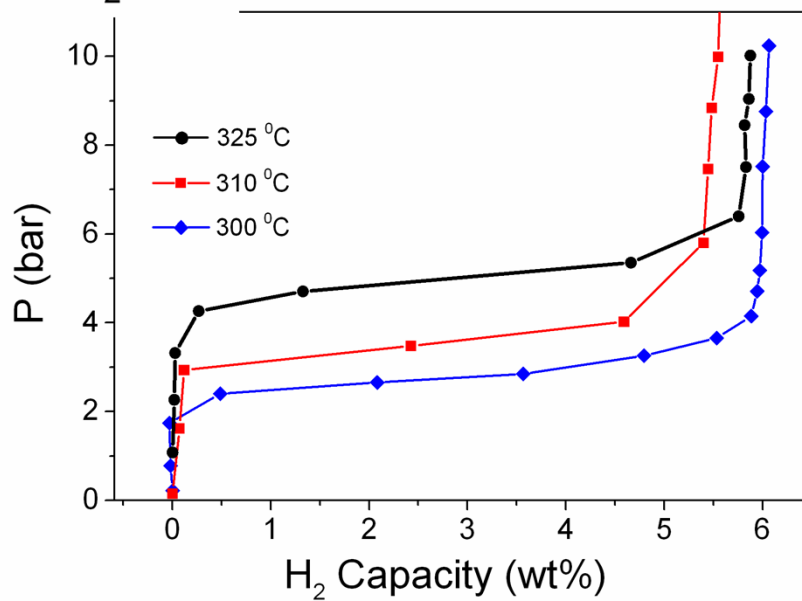

(b) MgH<sub>2</sub>/PSTN oxidised

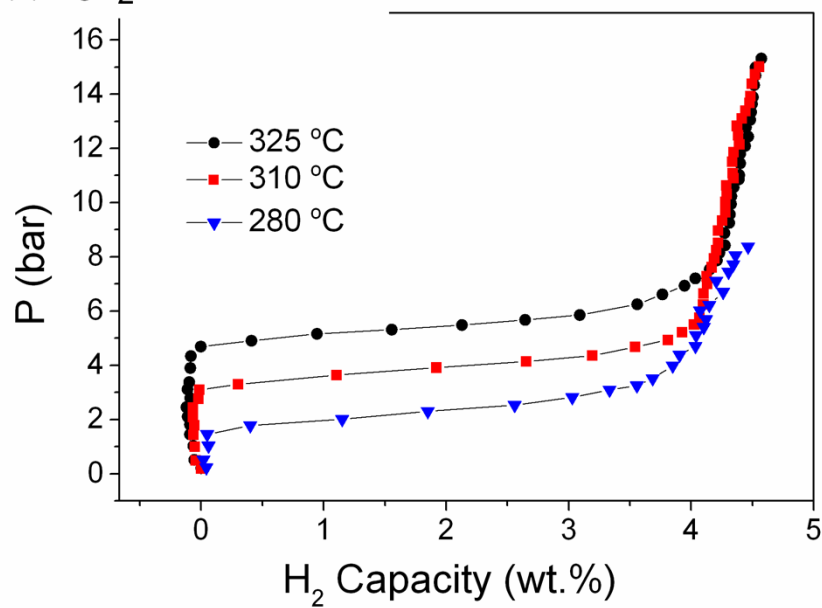

**Fig. S3.** PCI corresponding to the absorption of hydrogen in MgH<sub>2</sub>/PSTN before and after oxidation.

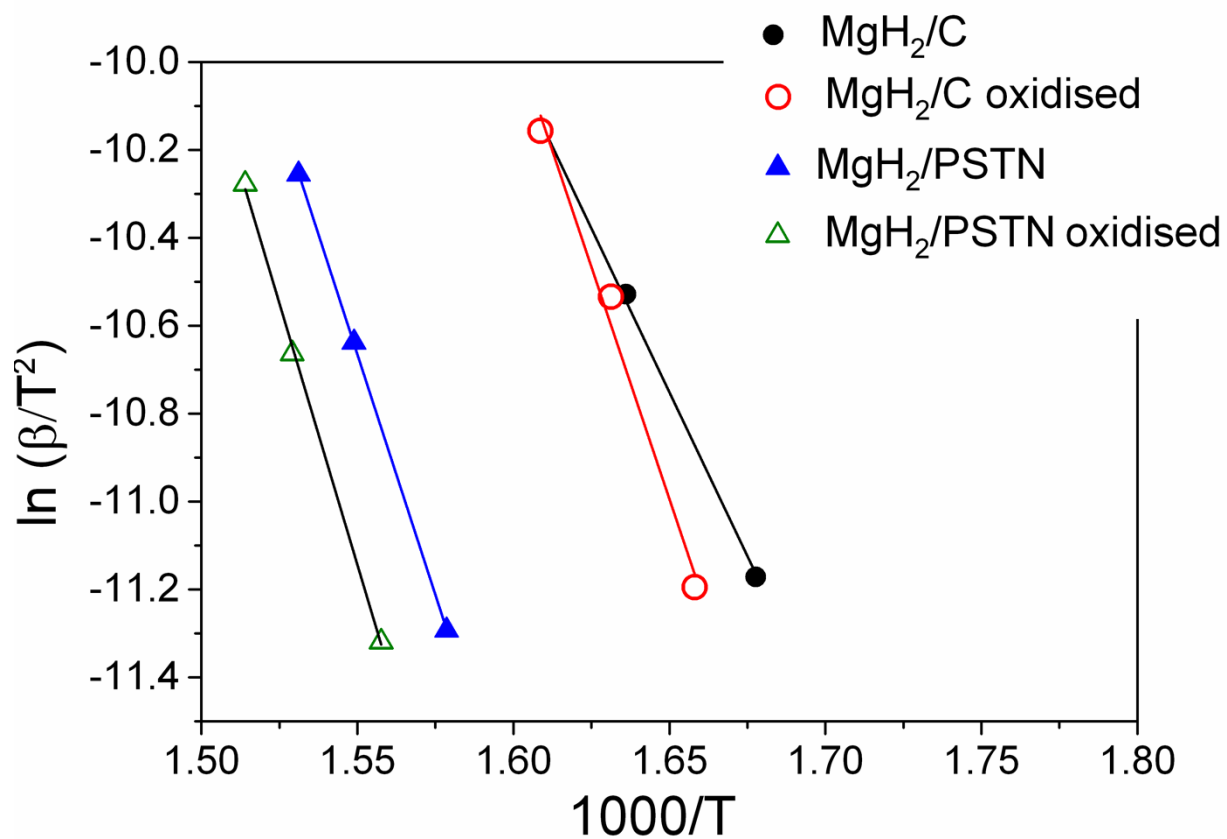

**Fig. S4.** Kissinger plots for  $\text{MgH}_2/\text{C}$  and  $\text{MgH}_2/\text{PSTN}$  before and after oxidation. These were determined from the hydrogen desorption profiles of the materials after PCI measurements.

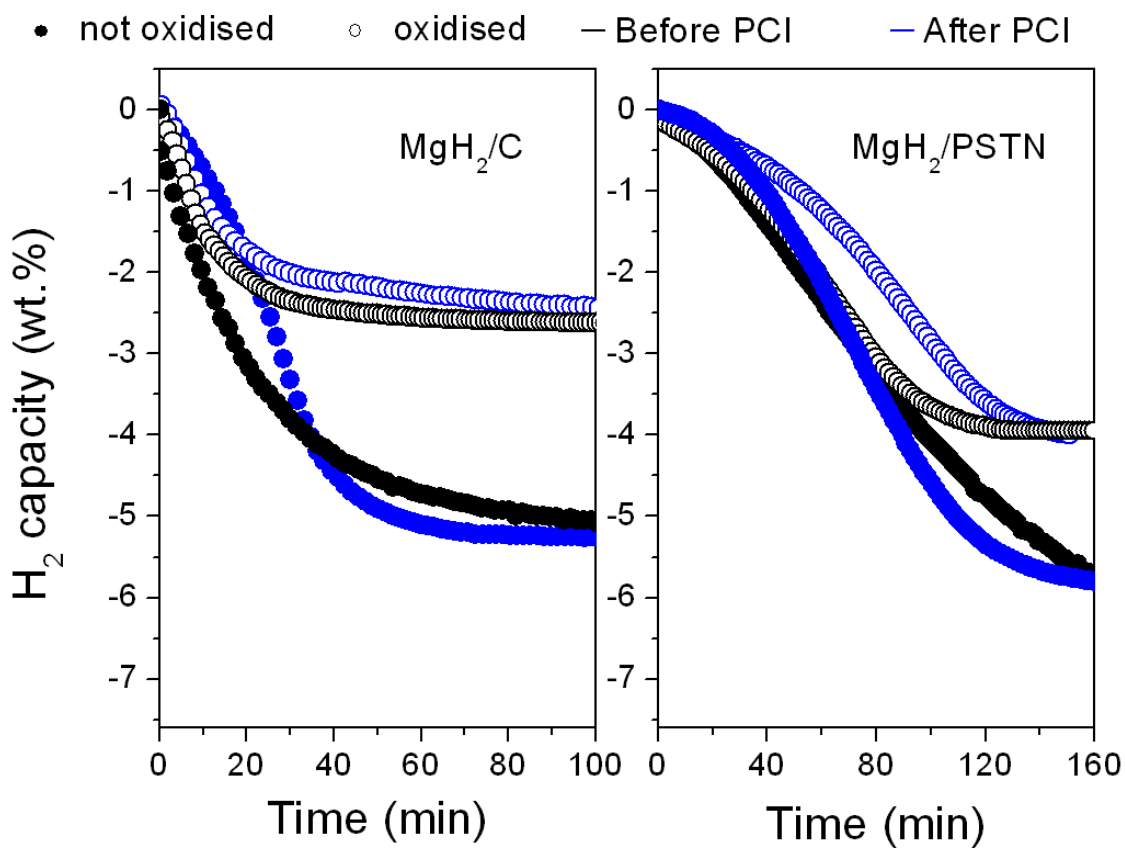

**Fig. S5.** Hydrogen desorption kinetics measured before and after performing PCI measurements during 1 week for MgH<sub>2</sub>/C and MgH<sub>2</sub>/PSTN, as synthesised and after oxidation for 24 h in air. The desorption kinetics were measured at 300 °C.

The hydrogen desorption kinetics were found to be stable even after PCI measurements.
